# Supplementary material for: Haplotype-resolved de novo assembly using phased assembly graphs with hifiasm
Source: Springer Nature journal article supplement (doi:10.1038/s41592-020-01056-5), 2021-02-01
Supplement: 41592_2020_1056_MOESM1_ESM.pdf [file 41592_2020_1056_MOESM1_ESM.pdf]

---

**Supplementary information**

---

**Haplotype-resolved de novo assembly  
using phased assembly graphs with hifiasm**

---

In the format provided by the  
authors and unedited

# Supplementary Information for

“Haplotype-resolved *de novo* assembly using phased assembly graphs with hifiasm”

## 1 Software commands

### 1.1 Hifiasm

To produce primary assemblies of homozygous samples (*M. musculus*, *Z. mays* and CHM13), hifiasm (version 0.12) was run with the following command which does not purge haplotig duplications:

```
hifiasm -o <outputPrefix> -t <nThreads> -l0 <HiFi-reads.fasta>
```

For heterozygous samples, hifiasm was run with the following command:

```
hifiasm -o <outputPrefix> -t <nThreads> <HiFi-reads.fasta>
```

We added ‘-D10’ for the octoploid *F. × ananassa* because the default k-mer cutoff seems too low:

```
hifiasm -o <outputPrefix> -t <nThreads> -D10 <HiFi-reads.fasta>
```

For trio-binning assembly, we first built the paternal trio index and the maternal trio index by yak (version r55) with the following commands:

```
yak count -b37 -t <nThreads> -o <pat.yak> <paternal-short-reads.fastq>
yak count -b37 -t <nThreads> -o <mat.yak> <maternal-short-reads.fastq>
```

and then we produced the paternal assembly and the maternal assembly with the following command:

```
hifiasm -o <outputPrefix> -t <nThreads> -1 <pat.yak> -2 <mat.yak> <HiFi-reads.fasta>
```

### 1.2 Falcon-Unzip

Falcon-kit (version 1.8.1) was run with the following HiFi-specific options:

```
length_cutoff_pr = 8000
ovlp_daligner_option = -k24 -h1024 -e.98 -l1500 -s100
ovlp_HPCdaligner_option = -v -B128 -M24
ovlp_DBsplit_option = -s400
overlap_filtering_setting = --max-diff 200 --max-cov 200 --min-cov 2 --n-core 24 --min-idt 98 --ignore-indels
```

Falcon-unzip-kit (version 1.3.7) was run with default options.

### 1.3 HiCanu

For primary assembly, HiCanu (version 2.1) was run with the following command line:

```
canu -p asm -d <outDir> genomeSize=<GSize> useGrid=false maxThreads=<nThreads> \
-pacbio-hifi <HiFi-reads.fasta>
```

The contigs labeled by ‘suggestedBubbles=yes’ were removed from the primary assembly. For trio-binning assembly, we ran HiCanu in two steps as recommended. We partitioned the HiFi reads by parental short reads with the following command:

```
canu -haplotype -p asm -d <outDir> genomeSize=<GSize> useGrid=false \
maxThreads=<nThreads> -haplotypePat <pat-reads.fq> -haplotypeMat <mat-reads.fq> \
-pacbio-raw <HiFi-reads.fasta>
```

Note that ‘-pacbio-raw’ was used to partition HiFi reads followed the document of HiCanu. We then perform HiCanu assemblies on partitioned reads.

## 1.4 Peregrine

For primary assemblies of all samples except maize, Peregrine (version 0.1.6.1) was run with the following command, where 48 is the number of threads in use:

```
docker run -it -v <workDir>:/wd --user $(id -u):$(id -g) cschin/peregrine:0.1.6.1 asm \
/wd/Input.fnfo 48 48 48 48 48 48 48 48 48 --with-consensus --with-alt --shimmer-r 3 \
--best_n_ovlp 8 --output <outDir>
```

For the highly repetitive maize genome, we employed the following options to improve contig contiguity:

```
docker run -it -v <workDir>:/wd --user $(id -u):$(id -g) cschin/peregrine:0.1.6.1 asm \
/wd/Input.fnfo 48 48 48 48 48 48 48 48 48 --with-consensus --with-alt --shimmer-r 3 \
--best_n_ovlp 255 --mc_upper 8192 --shimmer-w 32 --output <outDir>
```

For trio-binning assembly, we first used HiCanu to partition HiFi reads by parental short reads, and then assembled each haplotype individually by Peregrine.

## 1.5 Purge\_dups

Purge\_dups (version 1.2.3) was used to postprocess the output primary assemblies of HiCanu for all heterozygous samples except *R. muscosa*. The commands are as follows:

```
minimap2 -I6G -xmap-pb <asm.fa> <HiFi-reads.fasta> -t <nThreads> > <read-aln.paf>
bin/pbcstat <read-aln.paf>
bin/calcuts PB.stat > cutoffs
bin/split_fa <asm.fa> > <split.fa>
minimap2 -I6G -xasm5 -DP <split.fa> <split.fa> -t <nThreads> > <ctg-aln.paf>
bin/purge_dups -2 -T cutoffs -c PB.base.cov <ctg-aln.paf> > <dups.bed>
bin/get_seqs <dups.bed> <asm.fa>
```

Since running purge\_dups in default cannot produce primary assembly of HiCanu with right size for HG002, we manually adjusted the cutoff thresholds of purge\_dups as follows “5 7 11 30 22 42”.

## 1.6 Running asmgene

We aligned the cDNAs to the reference genome (Zm-B73-REFERENCE-NAM-5.0 for maize, GRCm38 for mouse, CHM13 reference generated by the T2T consortium for CHM13 and GRCh38 human genome for HG00733 and HG002) and contigs by minimap2 r974 and evaluated the gene completeness with paftools.js from the minimap2 package:

```
minimap2 -cxsplice:hq -t <nThreads> <asm.fa> <cDNAs.fa> > <aln.paf>
paftools.js asmgene -i.97 <ref.paf> <asm.paf>
```

We set the sequence identity threshold to be 97% with ‘-i.97’ to tolerate low per-base accuracy of ONT assemblies. For trio binning assemblies, we added option ‘-a’ to evaluate genes mapped to the autosomes only. When evaluating multi-copy genes retained in an assembly, we replaced ‘-i.97’ to ‘-i.99’ to increase the resolution.

## 1.7 Computing NGA50

We used minigraph (version 0.10-dirty-r361) and paftools (version 2.17-r974-dirty) to calculate the NGA50 of HG00733 and HG002 assemblies:

```
minigraph -xasm -K1.9g --show-unmap=yes -t <nThreads> <ref.fa> <asm.fa> > <asm.paf>
paftools.js asmstat <ref.fa.fai> <asm.paf>
```

where the ‘ref.fa’ is the GRCh38 version of human reference genome. In comparison to minimap2, minigraph tends to generate longer alignments and is more robust to highly variable regions. For CHM13, the CHM13 reference (v0.9) generated by the T2T consortium was used as ‘ref.fa’. The reason is that all CHM13 assemblies and the CHM13 reference were produced using the data from the exactly same cell line. So we ran minigraph with more stringent parameters as follows:

```
minigraph -xasm -g10k -r10k --show-unmap=yes -t <nThreads> <ref.fa> <asm.fa> > <asm.paf>
```

## 1.8 BUSCO

BUSCO (version 3.0.2) was used with the following command:

```
python3 run_BUSCO.py -i <asm.fa> -m genome -o <outDir> -c <nThreads> -l <lineage_dataset>
```

where ‘lineage\_dataset’ was set to *tetrapoda* for *R. muscosa*, set to *embryophyta* for *Z. mays*, *F. × ananassa* and *S. sempervirens* and set to *mammalia* for *M. musculus* and human genomes.

## 1.9 Determining resolved BACs

The resolution of BAC for different assemblies was evaluated using the pipeline at: <https://github.com/skoren/bacValidation>, except that we added option ‘-I6g’ to minimap2. There are 341 BACs for CHM13 but 11 of them cannot be resolved by CHM13 T2T reference, indicating these 11 BACs may have cloning artifacts. These problematic BACs were excluded when evaluating CHM13 assemblies. For the fully phased diploid assembly, we ran this pipeline on each haplotype. If a BAC is correctly reconstructed in any haplotype, we think it is resolved in the diploid assembly. The BAC libraries for CHM13 and HG00733 can be found at <https://www.ncbi.nlm.nih.gov/nuccore/?term=VMRC59+and+complete> and <https://www.ncbi.nlm.nih.gov/nuccore/?term=VMRC62+and+complete>, respectively.

## 1.10 QV evaluation

We used yak (version r55) to measure the per-base consensus accuracy (QV). To this end, we first built the index for the short reads coming from the same sample:

```
yak count -b37 -t <nThreads> -o <sr.yak> <short-reads.fastq>  
yak qv -t <nThreads> <sr.yak> <asm.fa>
```

## 1.11 Dipcall

For the male sample HG002, we ran dipcall (version 0.1) as follows:

```
dipcall.kit/run-dipcall -x dipcall.kit/hs37d5.PAR.bed <prefix> hs37d5.fa \  
  <pat-asm.fa> <mat-asm.fa> > <prefix.mak>  
make -j2 -f <prefix.mak>
```

For the female sample HG00733, we removed option ‘-x’. We used the GRCh37 variant of ‘hs37d5.fa’ here because GIAB works best with hs37d5.

## 1.12 Evaluating collapsed misassemblies for inbred samples

We used scripts at: <https://github.com/lh3/CHM-eval/blob/master/misc/clustreg.js>, and <https://github.com/lh3/CHM-eval/blob/master/misc/select-collapse-het.js>. The commands are as follows:

```
minimap2 -axasm20 -t <asm.fa> <HiFi-reads.fasta> | samtools sort -o <aln.bam> -  
htsbox pileup -vcf <asm.fa> -q20 -Q20 -l5000 -S5000 -s5 <aln.bam> > <var.vcf>  
./select-collapse-het.js -c <readCoverage> <var.vcf> | ./clustreg.js -n10
```

where ‘-l’ and ‘-S’ filter out alignments shorter than 5kb.

## 1.13 QUAST

QUAST (version 5.0.2) was used with the following command for all CHM13 assemblies:

```
quast.py -t <nThreads> --large --skip-unaligned-mis-contigs -r <ref.fa> -o <outDir> <asm.fa>
```

The CHM13 reference (v0.9) generated by the T2T consortium (see Data availability) was employed as the ‘ref.fa’.

## 1.14 Running CHM13 centromere evaluation

To identify potential centromeric regions on CHM13 reference (v0.9) by the T2T consortium, dna-nn (version r60) was used with the following command:

```
dna-brnn -Ai models/attcc-alpha.knm -t <nThreads> <ref.fa> > <ref.bed>
```

Short repetitive regions which are less than 100 kbp reported by dna-nn were filtered to avoid false positives. We then merged all remaining regions of each chromosome to get the potential centromeric regions. After that, all CHM13 assemblies were aligned to CHM13 reference with minimap2:

```
minimap2 -cx asm5 -z10000,200 -t <nThreads> <ref.fa> <asm.fa>
```

and winnowmap (version 1.1):

```
winnowmap -W <repeat.list> -cx asm5 -z10000,200 -t <nThreads> <ref.fa> <asm.fa>
```

where ‘-z10000,200’ was used to generate longer alignments. The alignments around potential centromeric regions were then inspected manually.

## 1.15 HG002 Major Histocompatibility Complex (MHC) evaluation

We aligned the HG002 MHC reference sequences (<https://github.com/NCBI-Hackathons/TheHumanPangenome/tree/master/MHC/assembly/MHCv1.1>) to each HG002 assembly with the following command:

```
minimap2 -cx asm20 -t <nThreads> <asm.fa> <MHC_ref.fa>
```

The alignment was then inspected manually.

## 1.16 Merqury

To evaluate QV with Merqury, the version 1.1 was used with the following command:

```
meryl count threads=<nThreads> k=21 output <index> <short-reads.fastq>  
merqury.sh <index> <asm.fa> <output>
```

**Supplementary Table 1: Misassembly statistics of CHM13 assemblies**

| Dataset            | Assembler    | NG50<br>(Mb) | # QAST misassemblies |                     | Diff per 1Mbp (paftools) |         |
|--------------------|--------------|--------------|----------------------|---------------------|--------------------------|---------|
|                    |              |              | misassemblies        | local misassemblies | mismatches               | indels  |
| CHM13<br>(primary) | hifiasm      | 88.9         | 186                  | 290                 | 1.9                      | 5.4     |
|                    | HiCanu       | 69.7         | 111                  | 238                 | 1.2                      | 3.6     |
|                    | Peregrine    | 37.8         | 1,100                | 967                 | 78.8                     | 19.4    |
|                    | Falcon       | 27.1         | 1,035                | 518                 | 42.3                     | 21.4    |
|                    | Canu (ONT)   | 80.0         | 1,103                | 2,142               | 60.5                     | 645.2   |
|                    | Flye (ONT)   | 37.5         | 883                  | 1,364               | 65.8                     | 595.3   |
|                    | Shasta (ONT) | 41.3         | 343                  | 1,770               | 67.5                     | 1,192.0 |

**Supplementary Table 2: Completeness of HG002 fully phased assemblies and HG00733 fully phased assemblies**

| Dataset | Assembler              | Haplotype   | Multi-copy genes<br>retained (%) | Gene completeness (asmgene) |                |
|---------|------------------------|-------------|----------------------------------|-----------------------------|----------------|
|         |                        |             |                                  | Complete (%)                | Duplicated (%) |
| HG00733 | hifiasm (trio)         | paternal    | 85.24                            | 99.49                       | 0.36           |
|         |                        | maternal    | 82.68                            | 99.35                       | 0.39           |
|         | HiCanu (trio)          | paternal    | 83.80                            | 99.41                       | 0.41           |
|         |                        | maternal    | 84.84                            | 99.25                       | 0.47           |
|         | Peregrine (trio)       | paternal    | 38.07                            | 99.00                       | 0.30           |
|         |                        | maternal    | 37.11                            | 98.94                       | 0.28           |
|         | Peregrine (Hi-C)       | haplotype 1 | 33.76                            | 99.03                       | 0.39           |
|         |                        | haplotype 2 | 32.72                            | 99.02                       | 0.40           |
|         | Peregrine (Strand-seq) | haplotype 1 | 34.00                            | 99.14                       | 0.16           |
|         |                        | haplotype 2 | 32.08                            | 99.16                       | 0.14           |
| HG002   | hifiasm (trio)         | paternal    | 79.97                            | 99.33                       | 0.47           |
|         |                        | maternal    | 81.32                            | 99.25                       | 0.34           |
|         | HiCanu (trio)          | paternal    | 79.33                            | 99.07                       | 0.43           |
|         |                        | maternal    | 81.56                            | 99.10                       | 0.45           |
|         | Peregrine (trio)       | paternal    | 38.23                            | 98.77                       | 0.36           |
|         |                        | maternal    | 39.27                            | 98.85                       | 0.34           |

**Supplementary Table 3: Potential centromeric regions on CHM13 reference by the T2T consortium**

| Chromosome | Centromere start | Centromere end | Length     |
|------------|------------------|----------------|------------|
| chr1       | 121,677,850      | 142,241,850    | 20,564,000 |
| chr2       | 90,991,658       | 94,695,197     | 3,703,539  |
| chr3       | 90,712,050       | 96,424,150     | 5,712,100  |
| chr4       | 49,705,150       | 55,303,250     | 5,598,100  |
| chr5       | 46,850,351       | 50,962,200     | 4,111,849  |
| chr6       | 58,285,850       | 61,068,750     | 2,782,900  |
| chr7       | 58,348,190       | 63,744,850     | 5,396,660  |
| chr8       | 44,238,850       | 46,331,250     | 2,092,400  |
| chr9       | 44,938,545       | 76,593,802     | 31,655,257 |
| chr10      | 38,527,450       | 42,982,850     | 4,455,400  |
| chr11      | 51,001,050       | 54,490,050     | 3,489,000  |
| chr12      | 34,580,550       | 37,221,350     | 2,640,800  |
| chr16      | 35,884,750       | 52,219,457     | 16,334,707 |
| chr17      | 21,915,450       | 27,577,348     | 5,661,898  |
| chr18      | 15,627,250       | 21,120,600     | 5,493,350  |
| chr19      | 24,565,150       | 29,770,450     | 5,205,300  |
| chr20      | 26,377,644       | 32,969,579     | 6,591,935  |
| chrX       | 57,801,750       | 60,937,950     | 3,136,200  |

Short repetitive regions which are less than 100 kbp reported by dna-nn were filtered to avoid false positives (see Supplementary Section 1.14). Acrocentric chromosomes chr13, chr14, chr15, chr21 and chr22 are not shown.

**Supplementary Table 4: Centromere alignment to the CHM13 reference by the T2T consortium**

| Assembler | Chromosome | Reference centromere length | Aligner  | Length diff (reference - assembly) | Alignment type | Is misassembly |
|-----------|------------|-----------------------------|----------|------------------------------------|----------------|----------------|
| hifiasm   | chr2       | 3,703,539                   | minimap2 | 0                                  | go through     | no             |
|           |            |                             | winnomap | 0                                  | go through     |                |
|           | chr8       | 2,092,400                   | minimap2 | 23,124                             | broken         | yes            |
|           |            |                             | winnomap | 24,317                             | broken         |                |
|           | chr11      | 3,489,000                   | minimap2 | 73,920                             | broken         | yes            |
|           |            |                             | winnomap | 75,629                             | broken         |                |
|           | chr12      | 2,640,800                   | minimap2 | 0                                  | go through     | no             |
|           |            |                             | winnomap | 0                                  | go through     |                |
| HiCanu    | chr8       | 2,092,400                   | minimap2 | 143                                | broken         | no             |
|           |            |                             | winnomap | 0                                  | go through     |                |
|           | chr20      | 6,591,935                   | minimap2 | -7,135                             | broken         | unknown        |
|           |            |                             | winnomap | -7,136                             | broken         |                |
| Falcon    | chr8       | 2,092,400                   | minimap2 | 2,107,885                          | broken         | yes            |
|           |            |                             | winnomap | 2,107,885                          | broken         |                |

For “Alignment type”, “go through” indicates there is an alignment covering the whole centromere, and “broken” indicates alignments are broken at the centromeric region. If the assembly is shorter than the CHM13 reference, the assembly is likely to be misassembled. Peregrine assembly and ONT assemblies break into large numbers of pieces around centromeres.

**Supplementary Table 5: BUSCO scores of human primary assemblies**

| Dataset         | Assembler       | Complete BUSCOs |                | Fragmented BUSCOs (%) | Missing BUSCOs (%) |
|-----------------|-----------------|-----------------|----------------|-----------------------|--------------------|
|                 |                 | Single-copy (%) | Duplicated (%) |                       |                    |
| human reference | GRCh38          | 94.03           | 0.80           | 2.49                  | 2.68               |
| CHM13           | T2T consortium  | 94.03           | 0.78           | 2.51                  | 2.68               |
|                 | hifiasm         | 94.09           | 0.95           | 2.31                  | 2.66               |
|                 | HiCanu          | 93.74           | 1.05           | 2.53                  | 2.68               |
|                 | Peregrine       | 93.93           | 0.83           | 2.49                  | 2.75               |
|                 | Falcon          | 94.05           | 0.88           | 2.36                  | 2.70               |
|                 | Canu (ONT)      | 91.98           | 0.93           | 4.02                  | 3.07               |
|                 | Flye (ONT)      | 92.20           | 0.93           | 3.83                  | 3.05               |
|                 | Shasta (ONT)    | 89.52           | 0.71           | 5.60                  | 4.17               |
| HG00733         | hifiasm (purge) | 94.01           | 1.05           | 2.31                  | 2.63               |
|                 | HiCanu (purge)  | 93.88           | 0.95           | 2.53                  | 2.63               |
|                 | Peregrine       | 94.05           | 1.00           | 2.39                  | 2.56               |
|                 | Falcon          | 92.71           | 0.90           | 2.27                  | 4.12               |
|                 | Canu (ONT)      | 90.98           | 0.90           | 4.78                  | 3.34               |
|                 | Flye (ONT)      | 91.45           | 0.63           | 4.90                  | 3.02               |
|                 | Shasta (ONT)    | 91.72           | 0.58           | 4.68                  | 3.02               |
| HG002           | hifiasm (purge) | 94.40           | 0.80           | 2.07                  | 2.73               |
|                 | HiCanu (purge)  | 94.23           | 0.85           | 2.31                  | 2.61               |
|                 | Peregrine       | 93.91           | 0.93           | 2.46                  | 2.70               |
|                 | Falcon          | 94.20           | 0.88           | 2.29                  | 2.63               |
|                 | Shasta (ONT)    | 90.86           | 0.56           | 5.04                  | 3.53               |

**Supplementary Table 6: BUSCO scores of haplotype-resolved human assemblies**

| Dataset | Assembler              | Haplotype   | BUSCOs (%)  |            |            |         |
|---------|------------------------|-------------|-------------|------------|------------|---------|
|         |                        |             | Complete    |            | Fragmented | Missing |
|         |                        |             | Single-copy | Duplicated |            |         |
| HG00733 | hifiasm (trio)         | paternal    | 93.01       | 0.85       | 2.36       | 3.78    |
|         |                        | maternal    | 93.86       | 0.97       | 2.41       | 2.75    |
|         | HiCanu (trio)          | paternal    | 93.71       | 0.97       | 2.56       | 2.75    |
|         |                        | maternal    | 93.88       | 1.05       | 2.39       | 2.68    |
|         | Peregrine (trio)       | paternal    | 94.35       | 0.97       | 2.22       | 2.46    |
|         |                        | maternal    | 93.76       | 0.88       | 2.66       | 2.70    |
|         | Peregrine (Hi-C)       | haplotype 1 | 93.96       | 1.00       | 2.39       | 2.66    |
|         |                        | haplotype 2 | 94.15       | 0.90       | 2.36       | 2.58    |
|         | Peregrine (Strand-seq) | haplotype 1 | 94.01       | 0.93       | 2.53       | 2.53    |
|         |                        | haplotype 2 | 94.05       | 1.05       | 2.29       | 2.61    |
| HG002   | hifiasm (trio)         | paternal    | 93.03       | 0.80       | 2.36       | 3.80    |
|         |                        | maternal    | 94.23       | 0.90       | 2.34       | 2.53    |
|         | HiCanu (trio)          | paternal    | 92.79       | 1.10       | 2.78       | 3.34    |
|         |                        | maternal    | 94.05       | 0.95       | 2.46       | 2.53    |
|         | Peregrine (trio)       | paternal    | 92.86       | 0.93       | 2.92       | 3.29    |
|         |                        | maternal    | 94.10       | 0.95       | 2.34       | 2.61    |



**Supplementary Table 7: BUSCO scores of non-human assemblies**

| Dataset                | Assembler       | Complete BUSCOs |                | Fragmented BUSCOs (%) | Missing BUSCOs (%) |
|------------------------|-----------------|-----------------|----------------|-----------------------|--------------------|
|                        |                 | Single-copy (%) | Duplicated (%) |                       |                    |
| <i>M. musculus</i>     | hifiasm         | 94.13           | 1.27           | 2.24                  | 2.36               |
|                        | HiCanu          | 94.15           | 1.29           | 2.07                  | 2.49               |
|                        | Peregrine       | 94.10           | 1.29           | 2.27                  | 2.34               |
|                        | Falcon          | 94.20           | 1.29           | 2.07                  | 2.44               |
| <i>Z. mays</i>         | hifiasm         | 87.48           | 8.43           | 1.47                  | 2.60               |
|                        | HiCanu          | 88.41           | 8.12           | 0.99                  | 2.48               |
|                        | Peregrine       | 87.92           | 8.24           | 1.30                  | 2.54               |
|                        | Falcon          | 88.04           | 8.12           | 1.24                  | 2.60               |
| <i>F. × ananassa</i>   | hifiasm (purge) | 5.02            | 93.43          | 0.06                  | 1.49               |
|                        | HiCanu          | 5.14            | 92.94          | 0.06                  | 1.86               |
|                        | HiCanu (purge)  | 41.70           | 55.08          | 0.25                  | 2.97               |
|                        | Peregrine       | 6.63            | 91.70          | 0.06                  | 1.61               |
|                        | Falcon          | 5.45            | 92.81          | 0.06                  | 1.67               |
| <i>R. muscosa</i>      | hifiasm (purge) | 64.91           | 1.70           | 13.29                 | 20.10              |
|                        | HiCanu          | 61.62           | 3.92           | 13.59                 | 20.86              |
|                        | Peregrine       | 65.11           | 1.72           | 12.94                 | 20.23              |
| <i>S. sempervirens</i> | hifiasm (purge) | 21.89           | 39.42          | 8.87                  | 29.82              |
|                        | Peregrine       | 27.27           | 35.93          | 9.02                  | 27.78              |

**Supplementary Table 8: Merqury QV of human assemblies**

| Assembler              | CHM13     | HG00733   | HG002     | HG00733 (fully phased) |            | HG002 (fully phased) |            |
|------------------------|-----------|-----------|-----------|------------------------|------------|----------------------|------------|
|                        | (primary) | (primary) | (primary) | pat / hap1             | mat / hap2 | pat / hap1           | mat / hap2 |
| hifiasm                | 54.55     | 52.47     | 52.87     |                        |            |                      |            |
| hifiasm (trio)         |           |           |           | 52.22                  | 52.73      | 52.68                | 54.08      |
| HiCanu                 | 54.53     | 53.38     | 55.43     |                        |            |                      |            |
| HiCanu (trio)          |           |           |           | 51.84                  | 51.59      | 48.88                | 50.40      |
| Peregrine              | 45.14     | 42.44     | 42.21     |                        |            |                      |            |
| Peregrine (trio)       |           |           |           | 44.52                  | 44.00      | 43.36                | 44.25      |
| Peregrine (Hi-C)       |           |           |           | 43.60                  | 43.73      |                      |            |
| Peregrine (Strand-seq) |           |           |           | 47.60                  | 48.20      |                      |            |
| Falcon                 | 50.76     | 48.44     | 48.26     |                        |            |                      |            |
| Canu (ONT)             | 34.06     | 30.46     |           |                        |            |                      |            |
| Flye (ONT)             | 34.62     | 31.10     |           |                        |            |                      |            |
| Shasta (ONT)           | 31.90     | 31.49     |           |                        |            |                      |            |

**Supplementary Table 9: Statistics of haplotype-resolved HG002 MHC assemblies**

| Assembler        | Haplotype | Reference MHC length | Alignment breakpoints | Alignment uncover length | Length diff (reference - assembly) | # diff bases |
|------------------|-----------|----------------------|-----------------------|--------------------------|------------------------------------|--------------|
| hifiasm (trio)   | paternal  | 5,077,518            | 0                     | 7                        | 0                                  | 569          |
|                  | maternal  | 4,979,891            | 0                     | 7                        | 0                                  | 125          |
| HiCanu (trio)    | paternal  | 5,077,518            | 1                     | 627                      | 0                                  | 340          |
|                  | maternal  | 4,979,891            | 0                     | 7                        | 0                                  | 559          |
| Peregrine (trio) | paternal  | 5,077,518            | 1                     | 7                        | 32,852                             | 826          |
|                  | maternal  | 4,979,891            | 1                     | 7                        | 32,856                             | 1,310        |

“Length diff (reference - assembly)” represents how many bases that are collapsed on assembly. “# diff bases” was collected from “NM:i” field of PAF format.

**Supplementary Table 10: Run time and peak memory usage of different assemblers**

| Dataset                             | Metric           | hifiasm | HiCanu  | HiCanu<br>+ purge_dups | Peregrine | Falcon  |
|-------------------------------------|------------------|---------|---------|------------------------|-----------|---------|
| <i>M. musculus</i><br>(primary)     | Elapsed time (h) | 3.9     | 25.2    |                        | 3.0       |         |
|                                     | CPU time (h)     | 147.1   | 493.6   |                        |           | 2,478.9 |
|                                     | Peak Memory (Gb) | 77.5    | 40.1    |                        | 464.2     |         |
| <i>Z. mays</i><br>(primary)         | Elapsed time (h) | 3.7     | 46.1    |                        | 35.3      |         |
|                                     | CPU time (h)     | 146.4   | 1,789.4 |                        |           | 3,016.0 |
|                                     | Peak Memory (Gb) | 71.1    | 65.5    |                        | 319.0     |         |
| <i>F. × ananassa</i><br>(primary)   | Elapsed time (h) | 3.9     | 19.0    | 19.5                   | 2.7       |         |
|                                     | CPU time (h)     | 159.6   | 641.0   | 656.7                  |           | 979.8   |
|                                     | Peak Memory (Gb) | 92.2    | 15.8    | 15.8                   | 206.3     |         |
| <i>R. muscosa</i><br>(primary)      | Elapsed time (h) | 69.0    |         |                        |           |         |
|                                     | CPU time (h)     | 2,856.5 |         |                        |           |         |
|                                     | Peak Memory (Gb) | 484.1   |         |                        |           |         |
| <i>S. sempervirens</i><br>(primary) | Elapsed time (h) | 72.9    |         |                        | 375.2     |         |
|                                     | CPU time (h)     | 4,492.0 |         |                        |           |         |
|                                     | Peak Memory (Gb) | 719.7   |         |                        | >3,000    |         |
| CHM13<br>(primary)                  | Elapsed time (h) | 7.6     | 49.2    |                        | 3.9       |         |
|                                     | CPU time (h)     | 292.7   | 1,057.2 |                        |           | 1,541.8 |
|                                     | Peak Memory (Gb) | 124.7   | 91.6    |                        | 684.5     |         |
| HG00733<br>(primary)                | Elapsed time (h) | 7.7     | 47.4    | 51.4                   | 4.7       |         |
|                                     | CPU time (h)     | 281.9   | 1,133.4 | 1,256.8                |           | 2,585.6 |
|                                     | Peak Memory (Gb) | 134.9   | 70.8    | 70.8                   | 707.2     |         |
| HG002<br>(primary)                  | Elapsed time (h) | 9.4     | 75.5    | 78.7                   | 4.9       |         |
|                                     | CPU time (h)     | 357.3   | 1,174.3 | 1236.4                 |           | 3,349.1 |
|                                     | Peak Memory (Gb) | 142.9   | 83.7    | 83.7                   | 749.8     |         |
| HG00733<br>(trio)                   | Elapsed time (h) | 9.5     | 43.1    |                        | 10.2      |         |
|                                     | CPU time (h)     | 331.0   | 925.5   |                        |           |         |
|                                     | Peak Memory (Gb) | 134.9   | 42.5    |                        | 445.1     |         |
| HG002<br>(trio)                     | Elapsed time (h) | 10.8    | 45.4    |                        | 9.7       |         |
|                                     | CPU time (h)     | 403.2   | 986.1   |                        |           |         |
|                                     | Peak Memory (Gb) | 142.9   | 41.1    |                        | 467.8     |         |

The majority of hifiasm, HiCanu and Peregrine assemblies were generated using a same machine with 48 CPU threads. The hifiasm *S. sempervirens* assembly was produced on another machine with 80 CPU threads. All Falcon assemblies, the Peregrine *R. muscosa* and *S. sempervirens* assemblies and the HiCanu *R. muscosa* assembly were generated using a cluster. Peregrine was run using docker. It is difficult to measure all the metrics of these assemblies without the assemblers logging the information.

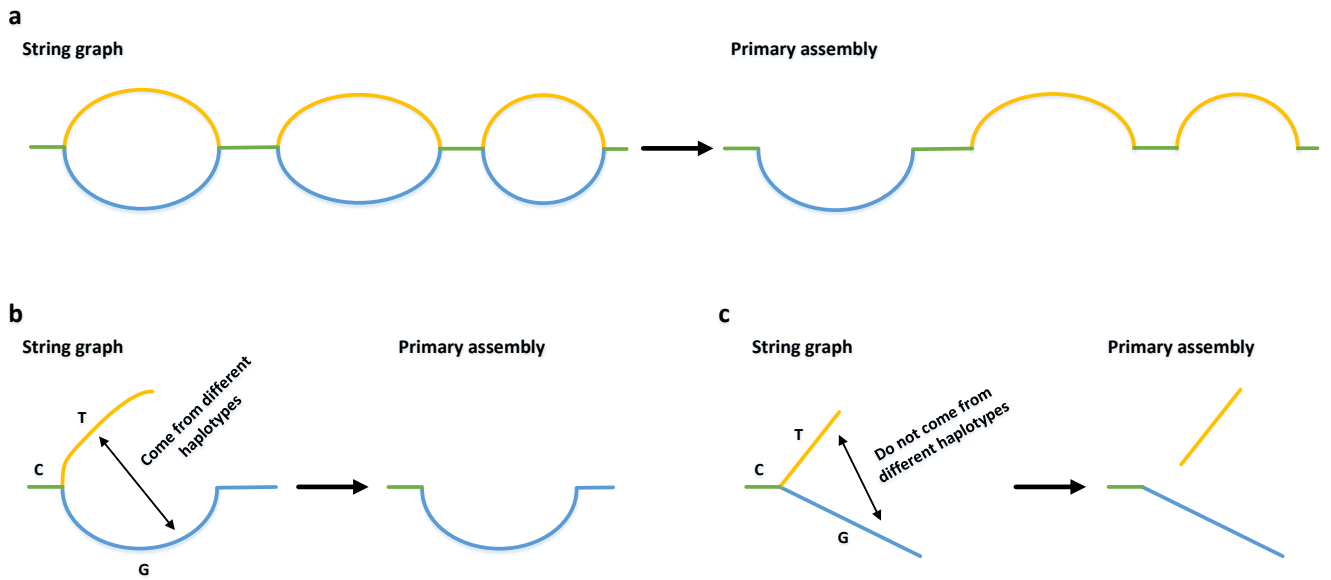

**Supplementary Fig. 1: Constructing primary assembly from string graph.** (a) Each bubble in the graph is reduced into a single path using bubble popping. (b) Given a tip unitig  $T$  in yellow that is broken in one end but connected to the green unitig  $C$  in another end, hifiasm checks if there is another blue unitig  $G$ , which is also connected to  $C$ , coming from the different haplotypes of  $T$ . In this case,  $T$  should be discarded from the primary assembly. (c) If  $G$  does not come from the different haplotypes of  $T$ , hifiasm uses the “best overlap graph” strategy to break this branch but still keeps  $T$  in the primary assembly.
